# Supplementary material for: Ecological factors influencing the diversity and distribution of Orchidaceae members in the Intercontinental Biosphere Reserve of the Mediterranean of Northern Morocco
Source: Research Square preprint supplement (doi:10.21203/rs.3.rs-7937762/v1), 2025-11-18
Supplement: Supplementary file 1 [file 1eab0426e93f70d99c65fd79.docx]

**Supplementary Material**

***Plant Ecology***

**Ecological factors influencing the diversity and distribution of Orchidaceae members in the Intercontinental Biosphere Reserve of the Mediterranean of Northern Morocco**

Yahya El Karmoudi1, Mohamed Libiad1,*, Ioulietta Samartza2, Abdelmajid Khabbach3, Maria Lazarina4*, Nikos Krigas2*

1Ecology, Systematics and Biodiversity Conservation Team, URL-CNRST N◦ 18, FS, Abdelmalek Essaadi University, M’Hannech II, Tetouan, Morocco

2Institute of Plant Breeding and Genetic Resources, Hellenic Agricultural Organization Demeter, Thermi, Greece

3Biotechnology, Environment, Agri-Food and Health Laboratory, Faculty of Sciences Dhar El Mahraz, Sidi Mohamed Ben Abdellah University, Fez, Morocco

4Department of Ecology, School of Biology, Aristotle University of Thessaloniki, Greece, Thessaloniki, Greece

*Corresponding authors: Mohamed Libiad ([libiad001@gmail.com](mailto:libiad001@gmail.com)), Maria Lazarina ([mlazarin@bio.auth.gr](mailto:mlazarin@bio.auth.gr)), Nikos Krigas ([nkrigas@elgo.gr](mailto:nkrigas@elgo.gr))


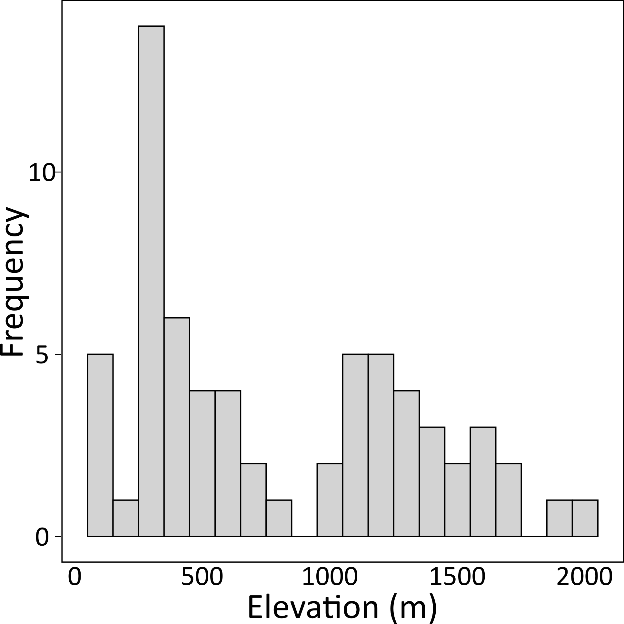


**Fig. S1**. Frequency distribution of site elevations in IBRM.

**Table S1.** Importance of Orchidaceae species and individual numbers according to habitat type

| **Habitat types** | **total number of orchid individuals/ Habitat types** | **Number of species/ Habitat types** |
| --- | --- | --- |
| Chamaephytic vegetation *Chamaerops humilis, Stachys fontqueri* | 1 | 1 |
| Forest *Abies marocana* | 183 | 8 |
| Forest degraged *Pteridium aquilinum* | 18 | 1 |
| Forest *Quercus canariensis* | 39 | 2 |
| Forest *Quercus ilex* | 234 | 9 |
| Forest *Quercus ilex* and *Q. faginea* | 61 | 4 |
| Forest Quercus pyrenaica | 11 | 1 |
| Forest *Quercus suber* | 348 | 10 |
| Forest siliceous *Quercus suber* | 60 | 4 |
| Matorral *Pistacia atlantica* | 23 | 1 |
| Matorral *Pistacia lentiscus, Myrtus communis* | 699 | 18 |
| Matorral *Quercus coccifera* | 90 | 3 |
| Matorral *Quercus ilex* | 122 | 5 |
| Pelouses with Asteraceae, Boraginaceae, and Poaceae members | 14 | 2 |

**Table S2. Importance of individual numbers of Orchidaceae according to substrate type**

| **Taxa** | **Number of sites** | **Number of individuals** | |
| --- | --- | --- | --- |
| **Calcareous substrate** | **Siliceous substrate** |
| *Cephalanthera longifolia* (L.) Fritsch | 7 | 79 | 0 |
| *Epipactis tremolsii* Pau | 3 | 36 | 0 |
| *Gennaria diphylla* (Link) Parl. | 2 | 16 | 0 |
| *Himantoglossum hircinum* (L.) Spreng. | 2 | 5 | 0 |
| *Himantoglossum robertianum* (Loisel.) P.Delforge | 4 | 166 | 0 |
| *Limodorum trabutianum* Batt. | 3 | 3 | 5 |
| *Neotinea conica* (Willd.) R.M.Bateman | 1 | 8 | 0 |
| *Neotinea maculata* (Desf.) Stearn | 7 | 75 | 0 |
| *Neotinea tridentata* (Scop.) R.M.Bateman, Pridgeon & M.W.Chase | 4 | 52 | 0 |
| *Ophrys apifera* Huds. | 8 | 196 | 0 |
| *Ophrys battandieri* E.G.Camus | 7 | 76 | 0 |
| *Ophrys bombyliflora* Link | 4 | 54 | 0 |
| *Ophrys fusca* Link | 5 | 26 | 0 |
| *Ophrys lutea* Cav. | 13 | 130 | 0 |
| *Ophrys lutea subsp. phryganae* (Devillers-Tersch. & Devillers) Melki | 2 | 28 | 0 |
| *Ophrys scolopax* Cav. | 8 | 45 | 0 |
| *Ophrys speculum* Link | 4 | 61 | 0 |
| *Ophrys tenthredinifera* Willd. | 11 | 169 | 0 |
| *Orchis anthropophora* (L.) All. | 5 | 82 | 0 |
| *Orchis spitzelii* subsp. *cazorlensis* (Lacaita) D.Rivera & Lopez Velez | 1 | 13 | 0 |
| *Orchis mascula* (L.) L. | 4 | 17 | 10 |
| *Orchis mascula* subsp. *laxifloriformis* Rivas Goday & B.Rodr. | 9 | 104 | 52 |
| *Serapias lingua* L. | 7 | 61 | 27 |
| *Serapias parviflora* Parl. | 16 | 259 | 11 |
| *Serapias strictiflora* Welw. ex Veiga | 3 | 14 | 11 |
| *Serapias vomeracea* (Burm.f.) Briq. | 1 | 0 | 12 |
